# Supplementary material for: High-Dose Daunorubicin in Older Patients with Acute Myeloid Leukemia
Source: Atypon-hosted journal article supplement (doi:10.1056/nejmoa0901409), 2009-09-23
Supplement: nejm_lowenberg_1235sa1.pdf [file nejm_lowenberg_1235sa1.pdf]

## Supplementary Appendix

This appendix has been provided by the authors to give readers additional information about their work.

Supplement to: Löwenberg B, Ossenkoppele GJ, van Putten W, et al. High-dose daunorubicin in older patients with acute myeloid leukemia. *N Engl J Med* 2009;361:1235-48.

## Ineligibility criteria as regards entry of patients in study

1. Previous induction treatment for AML/MDS
2. Prior chemotherapy within six months of study entry
3. Previous polycythemia rubra vera
4. Previous primary myelofibrosis
5. Blast crisis of chronic myeloid leukemia
6. AML-FAB type M3 or AML with cytogenetic abnormality t (15;17)
7. Hepatic or renal dysfunction as defined by:
  - a. Alanine Aminotransferase (ALT) and/or Aspartate Aminotransferase (AST) greater than 2.5 x normal value
  - b. Bilirubin greater than 2 x normal value
  - c. Serum creatinine greater than 2 x normal value (after adequate hydration), unless these are most likely caused by AML organ infiltration
8. Concurrent severe and/or uncontrolled medical condition (e.g., uncontrolled diabetes, infection, hypertension)
9. Cardiac disease as defined by:
  - a. myocardial infarction within the last six months of study entry, or
  - b. reduced left ventricular function with an ejection fraction less than or equal to 50% as measured by Multiple Gated Acquisition (MUGA) scan or echocardiogram (another method for measuring cardiac function being acceptable)
  - c. unstable angina
  - d. unstable cardiac arrhythmias

## Cytogenetic Risk Categories

*Favorable risk:* core binding factor abnormalities: t(8;21) (q22;q22), inv(16)(p13.1;q22), or t(16;16)(p13.1;q22).

*Very unfavorable risk:* a monosomal karyotype, defined by the presence of two autosomal monosomies or one autosomal monosomy in combination with at least one structural abnormality other than core binding factor<sup>16</sup>.

*Unfavorable risk:* complex cytogenetic abnormalities (at least three unrelated cytogenetic abnormalities), monosomies or partial deletions of chromosomes 5 or 7 (del(5q), del(7q), -5, -7), abnormalities of the long arm of chromosome 3 (q21;q26), t(6;9)(p23;q34), t(9;22)(q34;q11.2) or abnormalities involving the long arm of chromosome 11 (11q23)<sup>17</sup> unless the criteria of a monosomal karyotype were fulfilled.

## Supplementary Table 1 Causes of death in first complete remission

|                                                  | Induction treatment arm                     |                                          |
|--------------------------------------------------|---------------------------------------------|------------------------------------------|
|                                                  | A; Conventional<br>DNR 45 mg/m <sup>2</sup> | B: Escalated<br>DNR 90 mg/m <sup>2</sup> |
|                                                  | [numbers and percentages]                   |                                          |
| Death in first CR                                | 24                                          | 46                                       |
| <b>Death after cycle I or II</b>                 |                                             |                                          |
| infection/septicaemia/pneumonia                  | 11                                          | 15                                       |
| hemorrhage                                       | 4                                           | 1                                        |
| neutropenic enteritis                            | -                                           | 2                                        |
| intestinal perforation                           | -                                           | 1                                        |
| second malignancy                                | 1                                           | 4                                        |
| cardiac arrest/failure                           | 1                                           | 2                                        |
| multiple organ (liver, renal a.o)                | 1                                           | 3                                        |
| acute pulmonary embolism                         | -                                           | 1                                        |
| hypoxic encephalopathy                           | -                                           | 1                                        |
| unknown                                          | 1                                           | 2                                        |
| <b>Death after further postremission therapy</b> |                                             |                                          |
| infection/septicaemia                            | 2                                           | 3                                        |
| cardiac arrest/infarction                        | -                                           | -                                        |
| hemorrhage                                       | -                                           | 1                                        |
| second malignancy                                | -                                           | 1                                        |
| acute liver failure after GO                     | -                                           | 1                                        |
| neutropenic enteritis                            | 1                                           | -                                        |
| complications after alloSCT                      | 1                                           | 6                                        |
| aneurysma aorta rupture after alloSCT            | -                                           | 1                                        |
| unknown                                          | 1                                           | 1                                        |

### LEGEND

CR - complete remission

alloSCT: allogeneic hematopoietic stem cell transplantation

GO -geintuzumab ozogamicin
